# Supplementary material for: Separation and detection of cyproconazole enantiomers and its stereospecific recognition with chiral stationary phase by high-performance liquid chromatography
Source: Royal Society of Chemistry journal article supplement (doi:10.1039/c9an00950g), 2019-01-01
Supplement: c9an00950g1.pdf [file c9an00950g1.pdf]

## **Separation and detection of cyproconazole enantio-mers and its stereospecific recognition with chiral stationary phase by high-performance liquid chromatography**

Zongzhe He <sup>a</sup>, Fengxu Wu <sup>b</sup>, Weitong Xia <sup>a</sup>, Lianshan Li <sup>a</sup>, Kunming Hu <sup>a</sup>, Amir E. Kaziem <sup>a</sup>, Minghua Wang <sup>a</sup> \*

<sup>a</sup> Department of Pesticide Science, College of Plant Protection, Nanjing Agricultural University, State & Local Joint Engineering Research Center of Green Pesticide Invention and Application, Nanjing 210095, China

<sup>b</sup> College of Chemistry, Central China Normal University, Wuhan, Hubei 430079, China

\*Corresponding author: Email: wangmha@njau.edu.cn; Tel: +86 25 84395479; Fax: +86 25 84395479

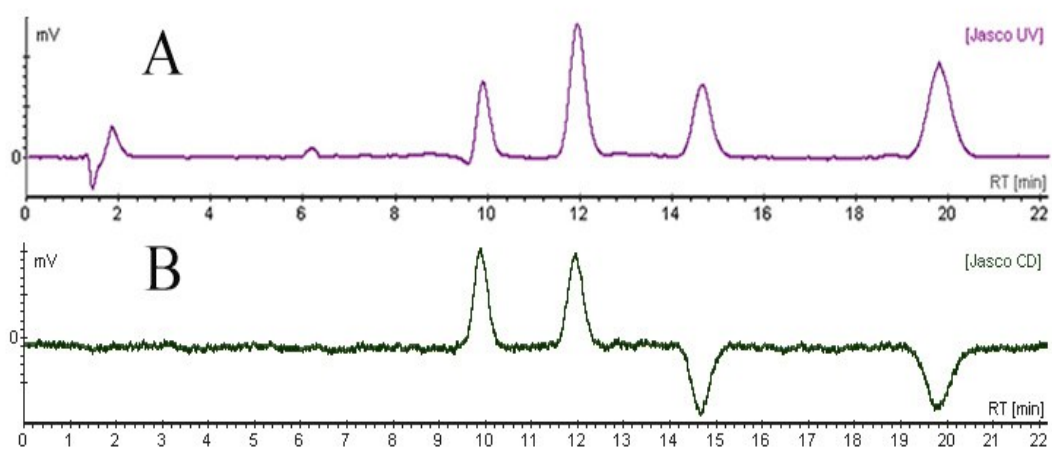

**Figure S1.** Chromatogram of cyproconazole with UV and CD detector: (A) UV signal;  
(B) CD signal

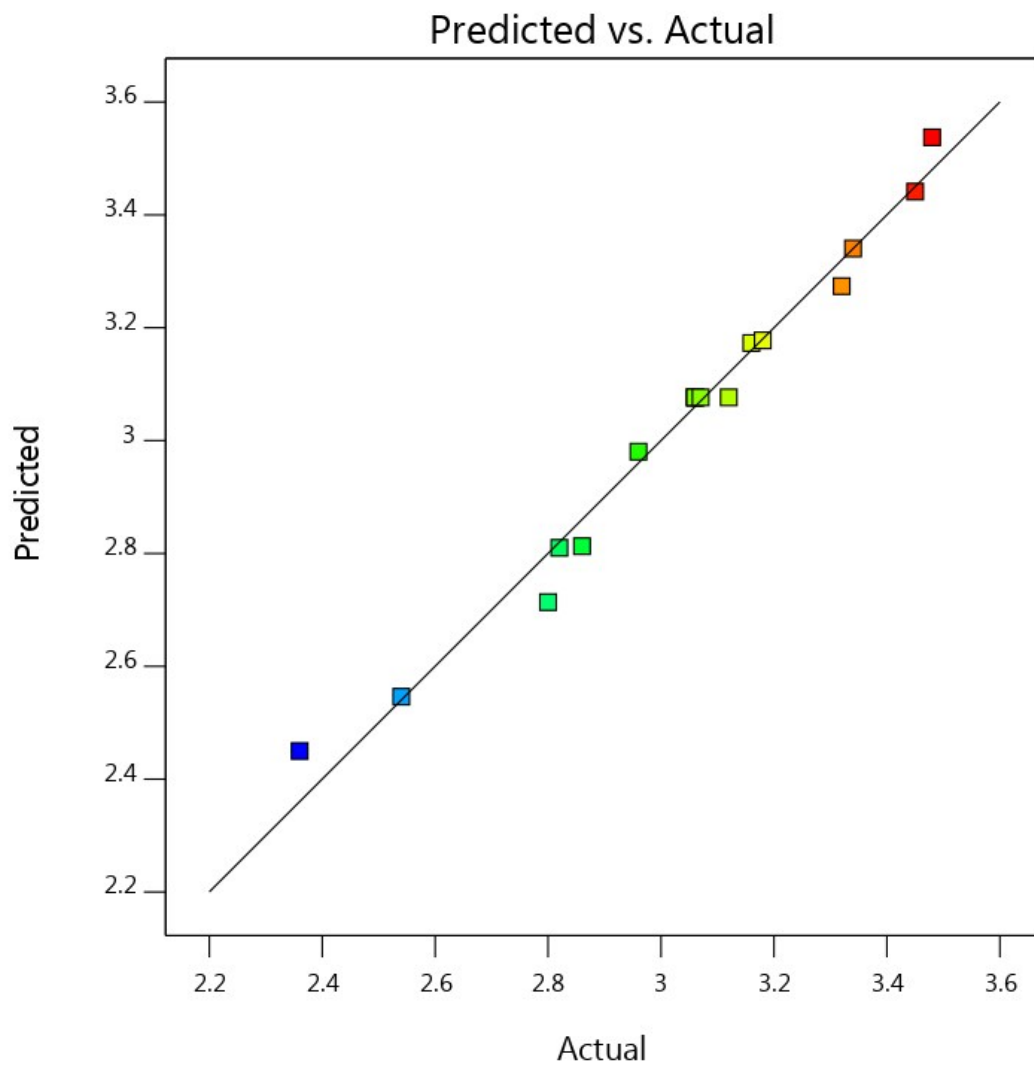

**Figure S2.** Experimental design to compare between the actual resolution conformity with the predicted resolution for cyproconazole on HPLC chromatograph

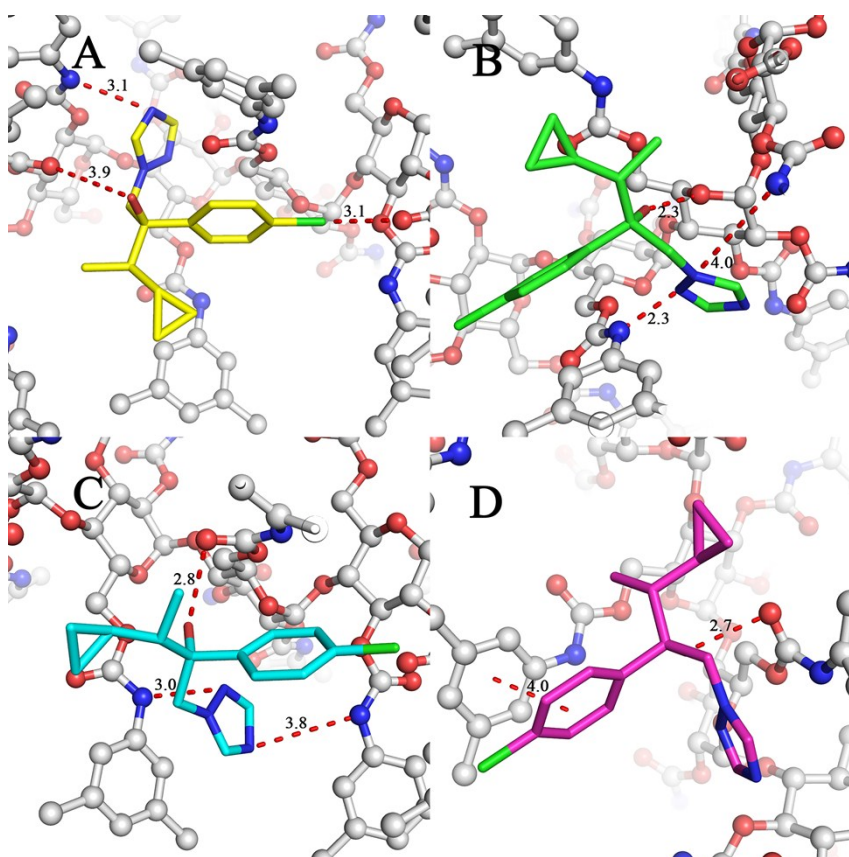

**Figure S3.** GOLD docking details of the final conformation interaction between four cyproconazole enantiomers and L1. A, B, C, D represent the detail interactions of L1 with (2R,3R)-(-)-cyproconazole, (2S,3S)-(+)-cyproconazole, (2R,3S)-(-)-cyproconazole and (2S,3R)-(+)-cyproconazole, respectively.

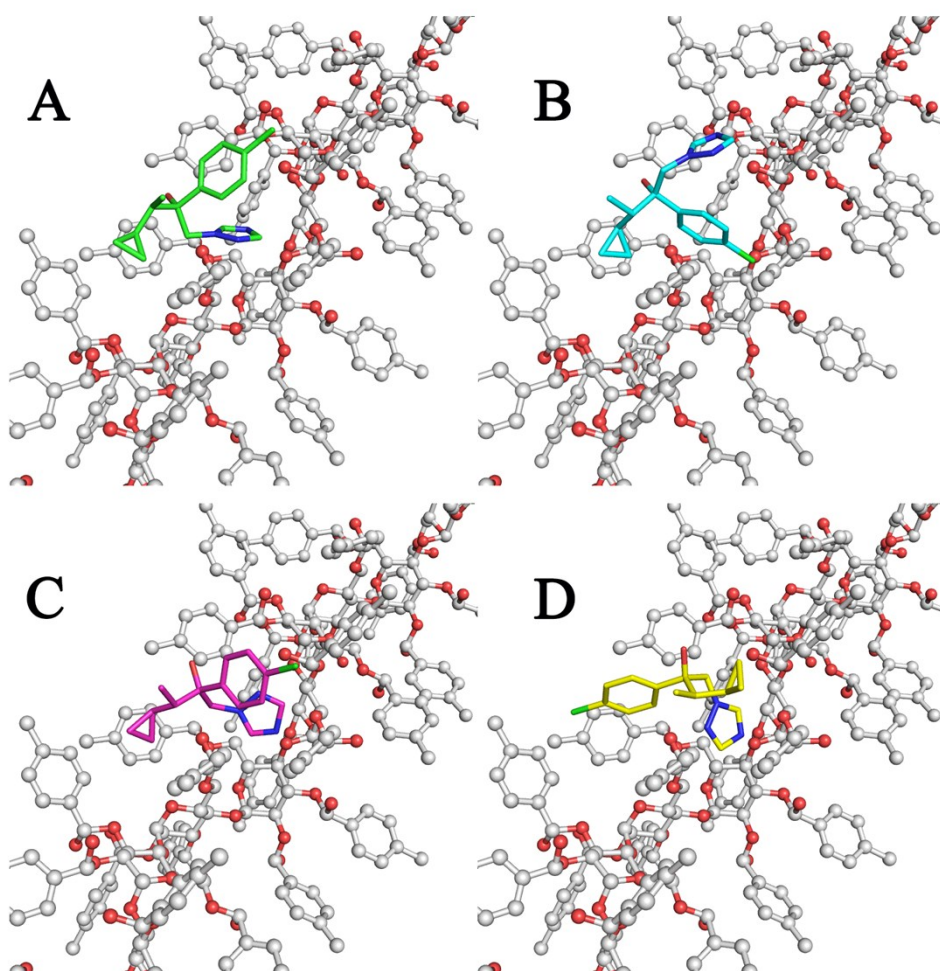

**Figure S4.** GOLD docking details of the final conformation interaction between four cyproconazole enantiomers and L3. A, B, C, D represent the detail interactions of L3 with (2R,3R)-(-)-cyproconazole, (2S,3S)-(+)-cyproconazole, (2R,3S)-(-)-cyproconazole and (2S,3R)-(+)-cyproconazole, respectively.

**Table S1**

Accuracy and precision of the proposed method in four matrices.

| Compound                        | Matrix   | Spiked level<br>(mg kg <sup>-1</sup> ) | Intraday(n=5)         |        |                       |        |                       |        | Interday<br>RSD(%) | (n=15) |
|---------------------------------|----------|----------------------------------------|-----------------------|--------|-----------------------|--------|-----------------------|--------|--------------------|--------|
|                                 |          |                                        | Day 1                 |        | Day 2                 |        | Day 3                 |        |                    |        |
|                                 |          |                                        | Average recoveries(%) | RSD(%) | Average recoveries(%) | RSD(%) | Average recoveries(%) | RSD(%) |                    |        |
| 2S,3R-(+)-<br>cyprocona<br>zole | Cucumber | 0.1                                    | 95.8                  | 8.1    | 94.7                  | 8.2    | 91.4                  | 10.3   | 2.4                |        |
|                                 |          | 0.2                                    | 94.2                  | 4.4    | 92.8                  | 4.9    | 91.8                  | 4.1    | 1.3                |        |
|                                 |          | 1                                      | 97.4                  | 4.4    | 97                    | 5      | 96.1                  | 3.7    | 0.7                |        |
|                                 | Pear     | 0.1                                    | 88                    | 8.2    | 90.2                  | 7.2    | 94.5                  | 5      | 3.6                |        |
|                                 |          | 0.2                                    | 92.7                  | 4.7    | 92.8                  | 4.7    | 91.4                  | 3.8    | 0.8                |        |
|                                 |          | 1                                      | 94.7                  | 3.9    | 95.8                  | 2.3    | 96.7                  | 2      | 1                  |        |
|                                 | Flour    | 0.1                                    | 86.2                  | 7.2    | 88.9                  | 7.8    | 92.8                  | 9.9    | 3.7                |        |
|                                 |          | 0.2                                    | 89.3                  | 5.5    | 90.3                  | 5.9    | 91.2                  | 2.7    | 1.1                |        |
|                                 |          | 1                                      | 93.4                  | 7.6    | 91.2                  | 4.5    | 93.3                  | 4.1    | 1.3                |        |
|                                 | Soil     | 0.1                                    | 96.2                  | 7.5    | 95.2                  | 7.9    | 95.6                  | 8.3    | 0.5                |        |
|                                 |          | 0.2                                    | 81.4                  | 7.3    | 82.7                  | 9.4    | 85.2                  | 8.9    | 2.3                |        |
|                                 |          | 1                                      | 94.7                  | 6.9    | 93.1                  | 5.5    | 91                    | 4.3    | 2                  |        |
| 2S,3S-(+)-<br>cyprocona<br>zole | Cucumber | 0.1                                    | 97.7                  | 6.3    | 95.2                  | 4.5    | 93.4                  | 8.1    | 2.3                |        |
|                                 |          | 0.2                                    | 105.1                 | 4.9    | 104.7                 | 5.3    | 102.1                 | 5.5    | 1.6                |        |
|                                 |          | 1                                      | 94.7                  | 2.7    | 96                    | 4.2    | 95.4                  | 5.1    | 0.7                |        |
|                                 | Pear     | 0.1                                    | 93.1                  | 9      | 89.3                  | 9.3    | 87.3                  | 9.5    | 3.3                |        |
|                                 |          | 0.2                                    | 97.2                  | 7.2    | 97.2                  | 7.2    | 96.4                  | 8.2    | 0.5                |        |
|                                 |          | 1                                      | 82.8                  | 5.8    | 85.6                  | 5.5    | 84.5                  | 5.2    | 1.7                |        |
|                                 | Flour    | 0.1                                    | 85.1                  | 5.9    | 85.7                  | 6.5    | 86.7                  | 7.8    | 0.9                |        |

|                                 |          |     |      |      |      |     |      |      |     |
|---------------------------------|----------|-----|------|------|------|-----|------|------|-----|
|                                 |          | 0.2 | 92   | 7.3  | 90.2 | 8.1 | 91.8 | 10   | 1.1 |
|                                 |          | 1   | 96.1 | 2.9  | 96.7 | 2.8 | 95.8 | 3.4  | 0.5 |
|                                 | Soil     | 0.1 | 93.7 | 6.5  | 91.6 | 7.4 | 92   | 8.2  | 1.2 |
|                                 |          | 0.2 | 91.4 | 9.6  | 89.7 | 9.7 | 87.3 | 4.7  | 2.3 |
|                                 |          | 1   | 93.5 | 6.9  | 92.8 | 7   | 90.2 | 5.3  | 1.9 |
|                                 | Cucumber | 0.1 | 88.1 | 6.9  | 85.6 | 9.9 | 83.9 | 10.9 | 2.5 |
|                                 |          | 0.2 | 90.4 | 3.8  | 88.2 | 5.8 | 87.4 | 6.5  | 1.8 |
|                                 |          | 1   | 84.2 | 4    | 85.6 | 3   | 87.1 | 2    | 1.7 |
|                                 | Pear     | 0.1 | 95.1 | 10.8 | 91.2 | 8.8 | 87.4 | 4.7  | 4.2 |
|                                 |          | 0.2 | 96.5 | 11   | 95.4 | 10  | 96.7 | 7.8  | 0.7 |
|                                 |          | 1   | 83.6 | 6.9  | 84   | 6.5 | 82.8 | 8.3  | 0.7 |
| 2R,3S-(-)-<br>cyprocona<br>zole | Flour    | 0.1 | 83.4 | 8.2  | 82.8 | 8.7 | 84.1 | 9.2  | 0.8 |
|                                 |          | 0.2 | 82.2 | 5.8  | 82.8 | 6.1 | 82.4 | 6.5  | 0.4 |
|                                 |          | 1   | 84.5 | 5.6  | 85.1 | 5   | 84.4 | 4.2  | 0.4 |
|                                 | Soil     | 0.1 | 80.7 | 9.6  | 78.2 | 3.3 | 78.8 | 3.3  | 1.6 |
|                                 |          | 0.2 | 96.9 | 2.1  | 95.6 | 2.2 | 96.1 | 2    | 0.7 |
|                                 |          | 1   | 90   | 4.6  | 88.1 | 7.1 | 88.3 | 7.3  | 1.2 |
|                                 | Cucumber | 0.1 | 87.9 | 5.8  | 88.7 | 7.5 | 90   | 6.9  | 1.2 |
|                                 |          | 0.2 | 86.3 | 4.4  | 86   | 5   | 83.7 | 4.9  | 1.7 |
|                                 |          | 1   | 81.8 | 4.6  | 84.5 | 2.8 | 83.8 | 3.6  | 1.7 |
| 2R,3R-(-)-<br>cyprocona<br>zole | Pear     | 0.1 | 91.6 | 8.1  | 87.6 | 8.6 | 84.8 | 5.4  | 3.9 |
|                                 |          | 0.2 | 93.4 | 4.6  | 92.2 | 3.7 | 92.8 | 3.2  | 0.6 |
|                                 |          | 1   | 86.4 | 6.9  | 86   | 6.6 | 88   | 2.7  | 1.2 |
|                                 | Flour    | 0.1 | 83.4 | 7.8  | 83   | 7.1 | 84.4 | 5.2  | 0.9 |
|                                 |          | 0.2 | 78.9 | 5.2  | 77.4 | 2.9 | 77.2 | 2.5  | 1.2 |
|                                 |          | 1   | 80.7 | 5.2  | 81.1 | 5.1 | 82.2 | 6.7  | 1   |

|      |     |      |     |      |      |      |     |     |
|------|-----|------|-----|------|------|------|-----|-----|
| Soil | 0.1 | 80.9 | 5.5 | 83.9 | 10.5 | 86.4 | 8.8 | 3.3 |
|      | 0.2 | 88.7 | 7.3 | 87.8 | 7.7  | 88.4 | 6.6 | 0.5 |
|      | 1   | 80.6 | 3.7 | 79   | 4.5  | 77.7 | 4.7 | 1.8 |

---
